# Supplementary material for: Development and characterization of TrMab-6, a novel anti-TROP2 monoclonal antibody for antigen detection in breast cancer
Source: PubMed Central journal article supplement (PMC7723163; doi:10.3892/mmr.2020.11731), 2020-11-25
Supplement: Supplementary_Data.pdf [file Supplementary_Data.pdf]

Figure S1. The comparison of amino acid sequences at the hinge region of mouse IgGs, and the confirmation of transfection for TROP2 using western blot analysis. (A) The hinge sequence of TrMab-6 was identical to that of mouse IgG<sub>2b</sub>. (B) The cell lysates (10 μg) of CHO-K1, CHO/TROP2-PA, MCF7, BINDS-29 (MCF7/TROP2-KO), BT-474, Lec1/TROP2, Lec2/TROP2 and Lec8/TROP2 were subjected to SDS-PAGE and transferred onto the PVDF membranes. The membranes were incubated with an anti-PA mAb (NZ-1) and an anti-β-actin mAb (AC-15), followed by secondary antibodies. \*Identical amino acid among mouse IgG subclasses. TROP2, Trophoblast cell-surface antigen 2; mAb, monoclonal antibody.

**A**

|                         |                          |
|-------------------------|--------------------------|
| TrMab-6                 | EPSPGPISTINPCPPCKECKKCPA |
| Mouse IgG <sub>2b</sub> | EPSPGPISTINPCPPCKECKKCPA |
| Mouse IgG <sub>2a</sub> | EPRGP--TIKPCPPC----KCPA  |
| Mouse IgG <sub>3</sub>  | EPRIP----KPSTPPGS--SCPP  |
| Mouse IgG <sub>1</sub>  | VPRDC-----GCKPC----ICTV  |
|                         | * . * *                  |

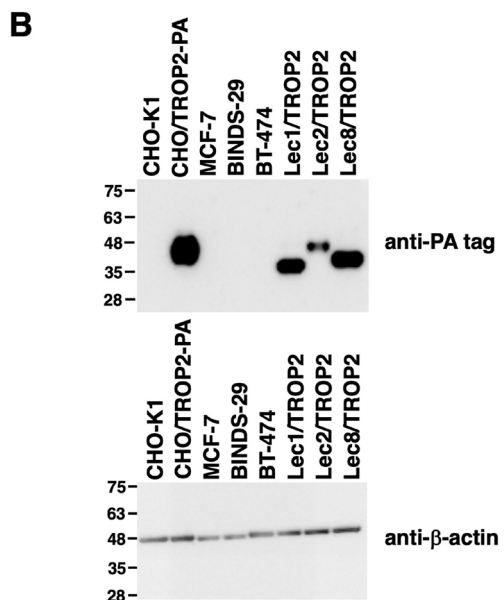

Figure S2. Flow cytometric detection of TROP2 using TrMab-6 and EPR20043. MCF7 (A and B), BINDS-29 (MCF7/TROP2-KO) (C and D), and BT-474 (E and F) cells were incubated with TrMab-6 (1  $\mu\text{g}/\text{ml}$ ; red line) (A, C and E), EPR20043 (1/60 dilution; blue line) (B, D and F) or 0.1% BSA in PBS (gray) for 30 min, followed by Alexa Fluor 488-conjugated secondary antibodies. Fluorescence data were collected using a cell analyzer. TROP2, Trophoblast cell-surface antigen 2.

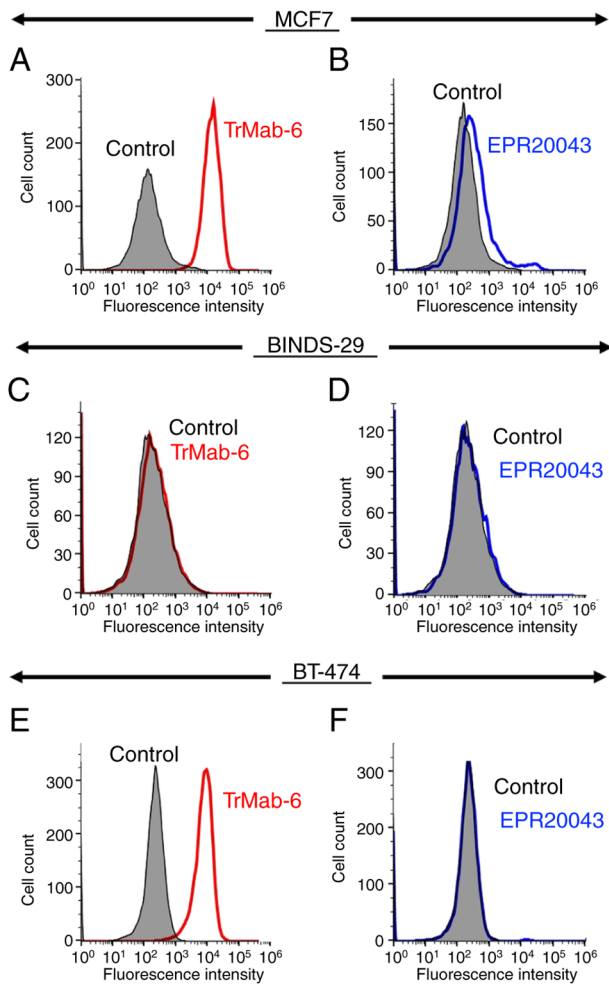

Figure S3. Detection of TROP2 with TrMab-6 and EPR20043 by western blot analysis. The cell lysates (10  $\mu$ g) of MCF7, BINDS-29 (MCF7/TROP2-KO), and BT-474 were subjected to SDS-PAGE and transferred onto the PVDF membranes. The membranes were incubated with (A) TrMab-6 (5  $\mu$ g/ml), (B) EPR20043 (1:2,000 dilution) and an (C) anti- $\beta$ -actin mAb (AC-15; 1  $\mu$ g/ml), followed by secondary antibodies. TROP2, Trophoblast cell-surface antigen 2; mAb, monoclonal antibody.

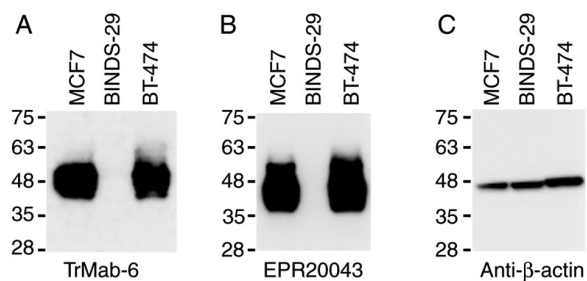

Table SI. Commercially available anti-human TROP2 mAbs.

| Clone                                                                | Company                         | Species | Isotype           | Immunogen                            | Applications   |                      |              |
|----------------------------------------------------------------------|---------------------------------|---------|-------------------|--------------------------------------|----------------|----------------------|--------------|
|                                                                      |                                 |         |                   |                                      | Flow cytometry | Immunohistochemistry | Western blot |
| NY18                                                                 | BioLegend, Inc.                 | Mouse   | IgG <sub>2a</sub> | PK-1 (Human)                         | +              | -                    | -            |
| 001                                                                  | Sino Biological, Inc.           | Rabbit  | IgG               | Protein                              | +              | -                    | -            |
| TACSTD2/2153                                                         | Biorbyt Ltd                     | Mouse   | IgG <sub>1</sub>  | Protein                              | -              | +                    | -            |
| LS-C178765                                                           | LifeSpan BioSciences, Inc.      | Mouse   | IgG <sub>1</sub>  | Protein                              | -              | +                    | -            |
| LS-C489658                                                           | LifeSpan BioSciences, Inc.      | Mouse   | -                 | Protein                              | -              | +                    | -            |
| TA310025                                                             | Origene Technologies, Inc.      | Mouse   | IgG <sub>1</sub>  | Human choriocarcinoma cell line BeWo | -              | +                    | -            |
| 8C6C1D7                                                              | Sino Biological, Inc.           | Mouse   | IgG <sub>1</sub>  | Protein                              | -              | +                    | -            |
| M005                                                                 | Abcam                           | Mouse   | IgG <sub>1</sub>  | Carcinoma cell line A431             | -              | -                    | +            |
| H00004070-K                                                          | Abnova                          | Rabbit  | IgG               | Peptide                              | -              | -                    | +            |
| D1W5W                                                                | Cell Signaling Technology, Inc. | Rabbit  | IgG               | Peptide                              | -              | -                    | +            |
| 162-46.2                                                             | Abcam                           | Mouse   | IgG <sub>1</sub>  | Human choriocarcinoma cell line BeWo | +              | +                    | -            |
| 01                                                                   | Enzo Life Sciences              | Mouse   | IgG <sub>1</sub>  | Protein                              | +              | +                    | -            |
| LS-C489657                                                           | LifeSpan BioSciences, Inc.      | Mouse   | IgG               | Protein                              | +              | +                    | -            |
| 1                                                                    | Thermo Fisher Scientific, Inc.  | Rabbit  | IgG               | Protein                              | +              | +                    | -            |
| 49D6                                                                 | GeneTex, Inc.                   | Mouse   | IgG <sub>2</sub>  | Protein                              | +              | -                    | +            |
| SP294                                                                | Abcam                           | Rabbit  | IgG               | Peptide                              | -              | +                    | +            |
| SP295                                                                | Abcam                           | Rabbit  | IgG               | Peptide                              | -              | +                    | +            |
| TACSTD2/2152                                                         | Biorbyt Ltd                     | Mouse   | IgG <sub>1</sub>  | Protein                              | -              | +                    | +            |
| TACSTD2/2151                                                         | Biorbyt Ltd                     | Mouse   | IgG <sub>2b</sub> | Protein                              | -              | +                    | +            |
| TCSR2-1                                                              | Biorbyt Ltd                     | Mouse   | IgG <sub>1</sub>  | Protein                              | -              | +                    | +            |
| EPR20043                                                             | Abcam                           | Rabbit  | IgG               | Peptide                              | +              | +                    | +            |
| SP293                                                                | Abcam                           | Rabbit  | IgG               | Peptide                              | +              | +                    | +            |
| TROP2, Trophoblast cell-surface antigen 2; mAb, monoclonal antibody. |                                 |         |                   |                                      |                |                      |              |
